# Supplementary material
Source: publisher figshare collection journal article supplement (https://rs.figshare.com/ndownloader/files/17379779)
Supplement: Supplementary file 1 [file 17379779]

Supporting information

Focal Adhesion Clustering Drives Endothelial Cell Morphology on Patterned Surfaces

C.F. Natale1,2, J. Lafaurie-Janvore1, M. Ventre3, A. Babataheri1, A.I. Barakat1

1 Hydrodynamics Laboratory, Ecole Polytechnique, CNRS UMR7646, Palaiseau, France

2 Interdisciplinary Research Center in Biomedical Materials, University of Naples Federico II, Naples 80125, Italy

3Department of Chemical, Materials and Industrial Production Engineering and Interdisciplinary Research Centre on Biomaterials , University of Naples Federico II, Italy


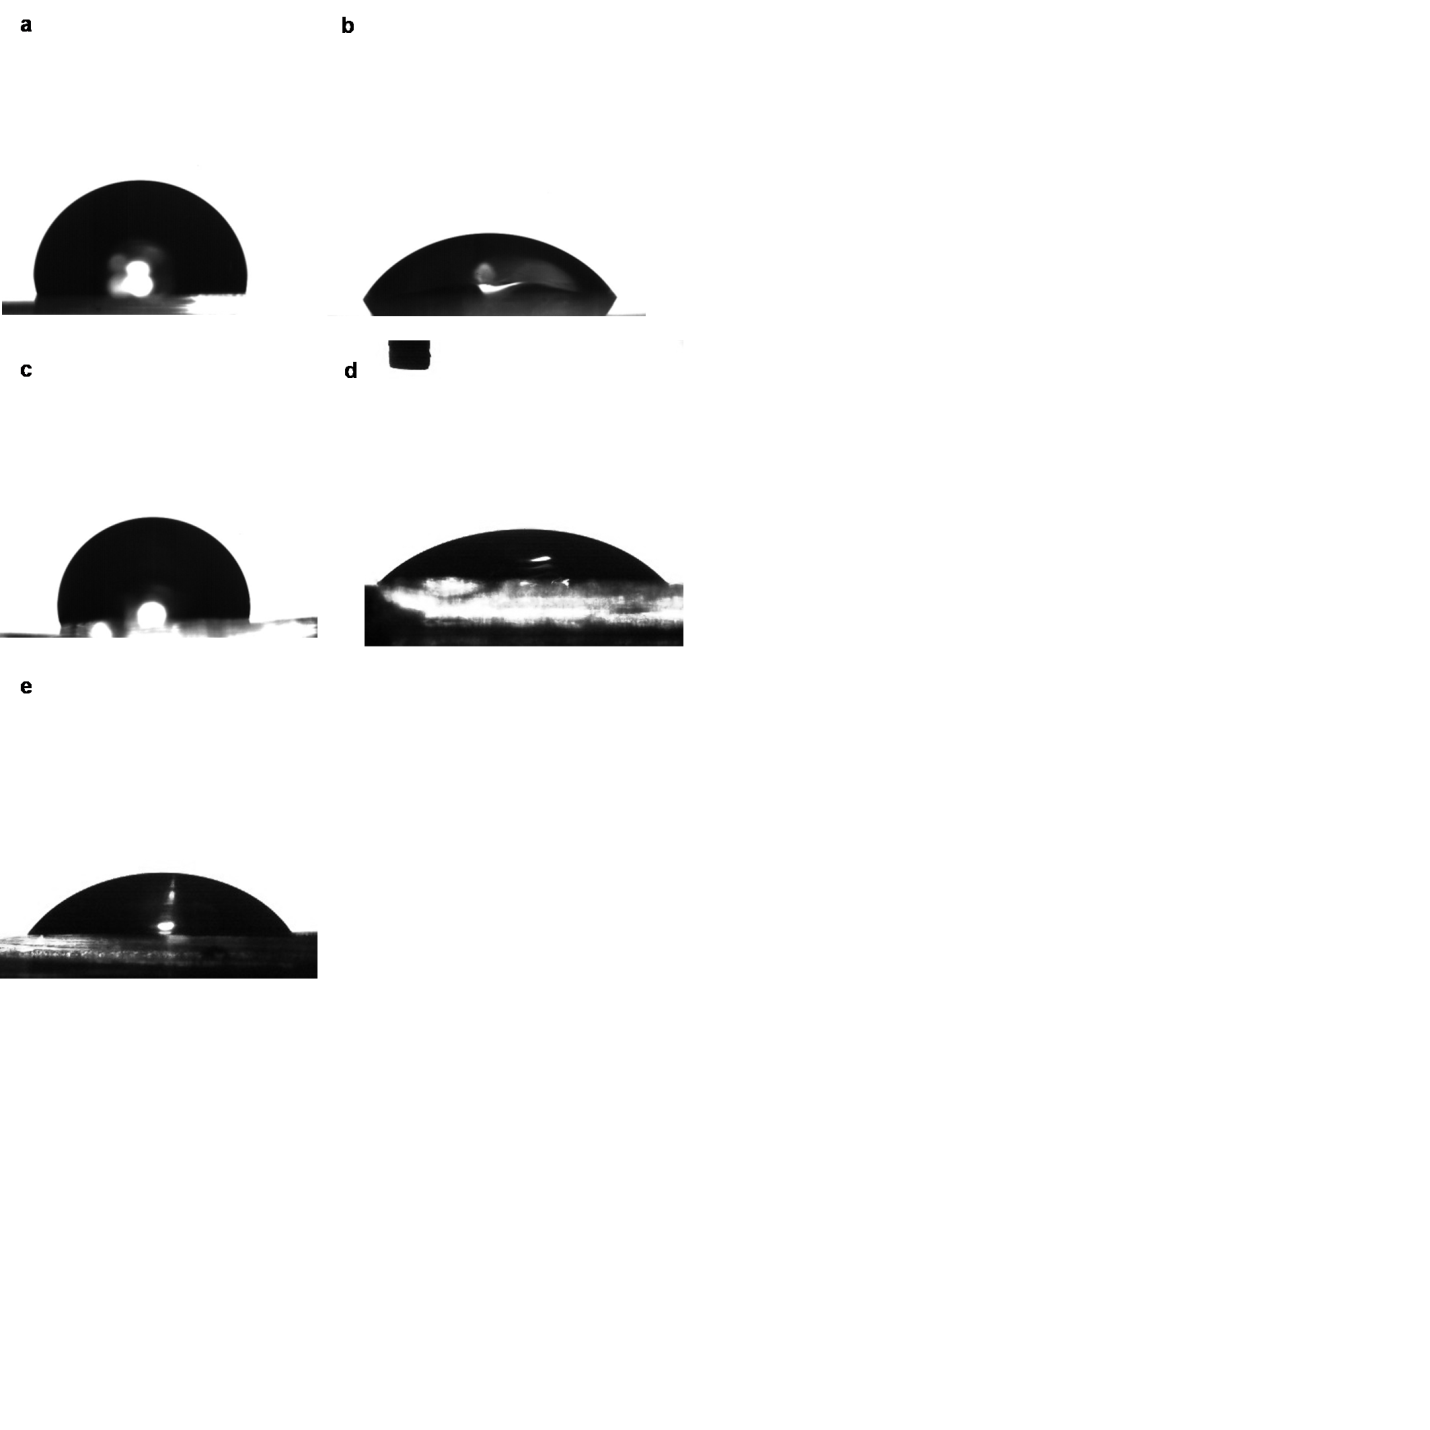


Figure S1: Spreading of water droplets on Un (a), µP (b), µG (c), Un* (d), µG* (e) substrates.


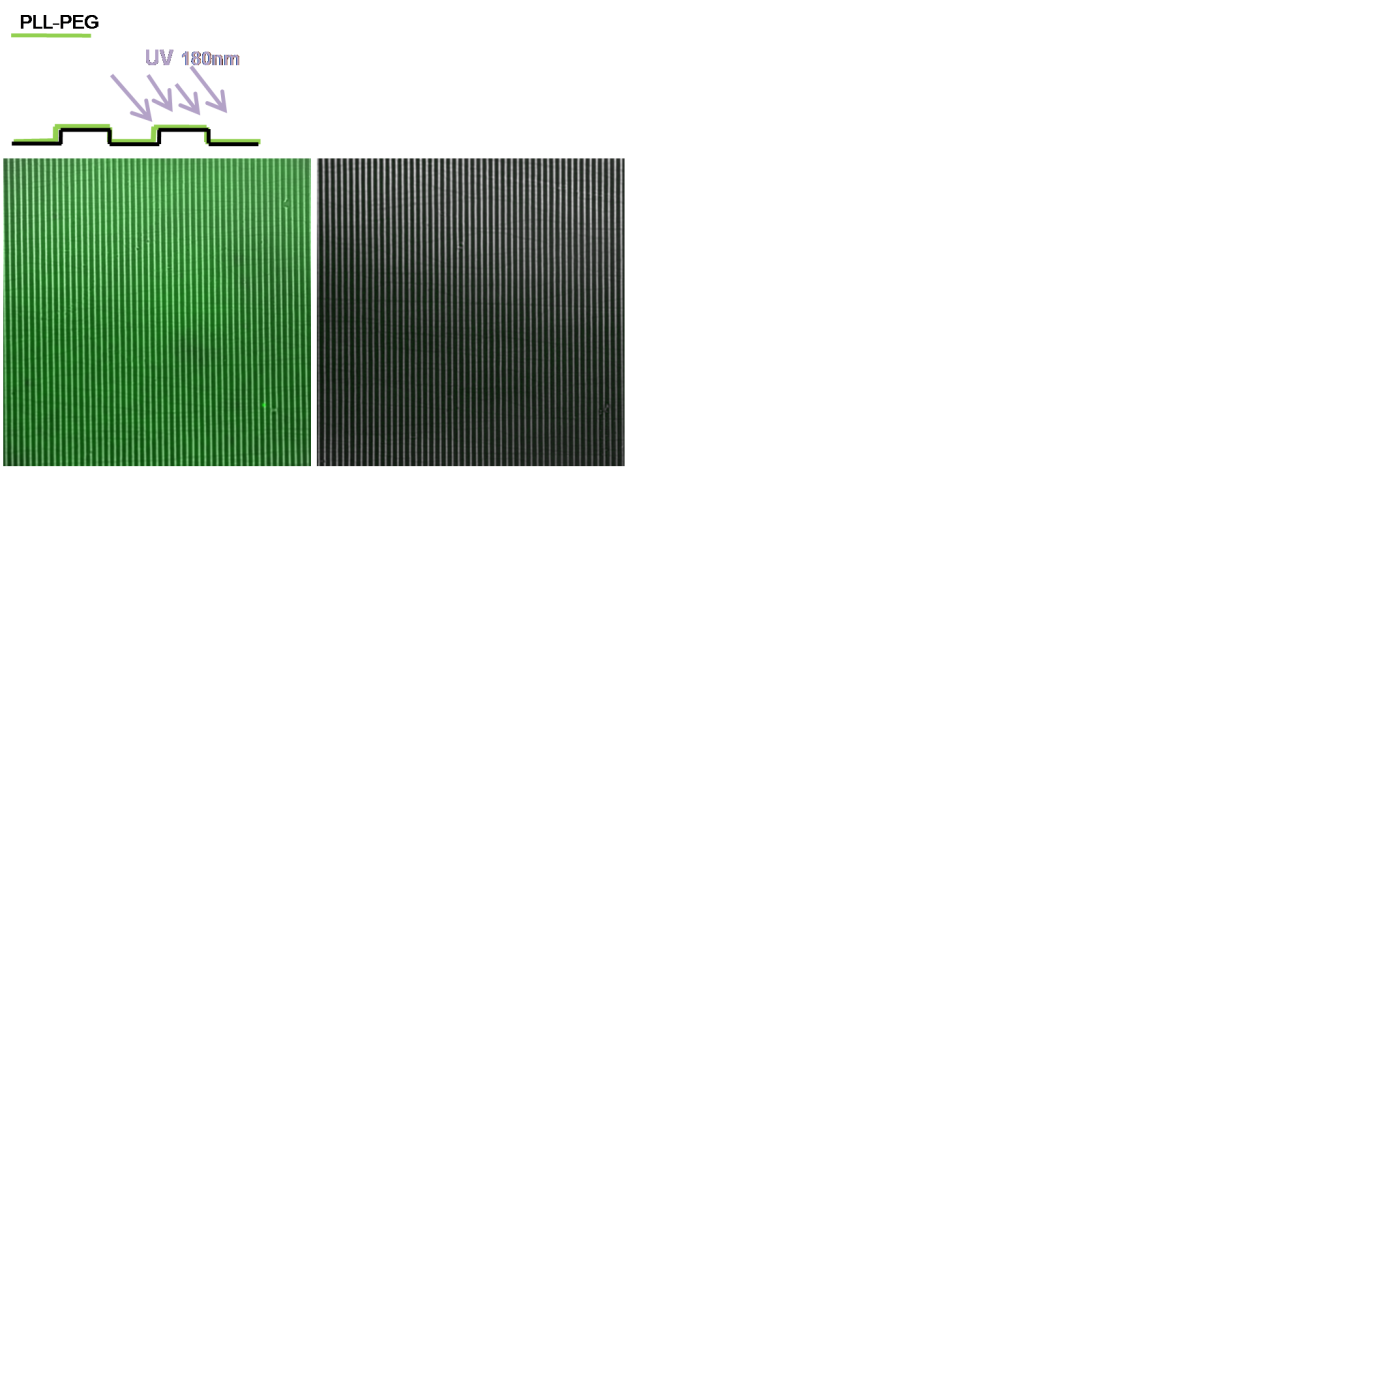


Figure S2: Fabrication of the µG* substrates. Epifuorescent images of a µG* substrate coated with FITC-PLL-PEG before and after UV irradiation.


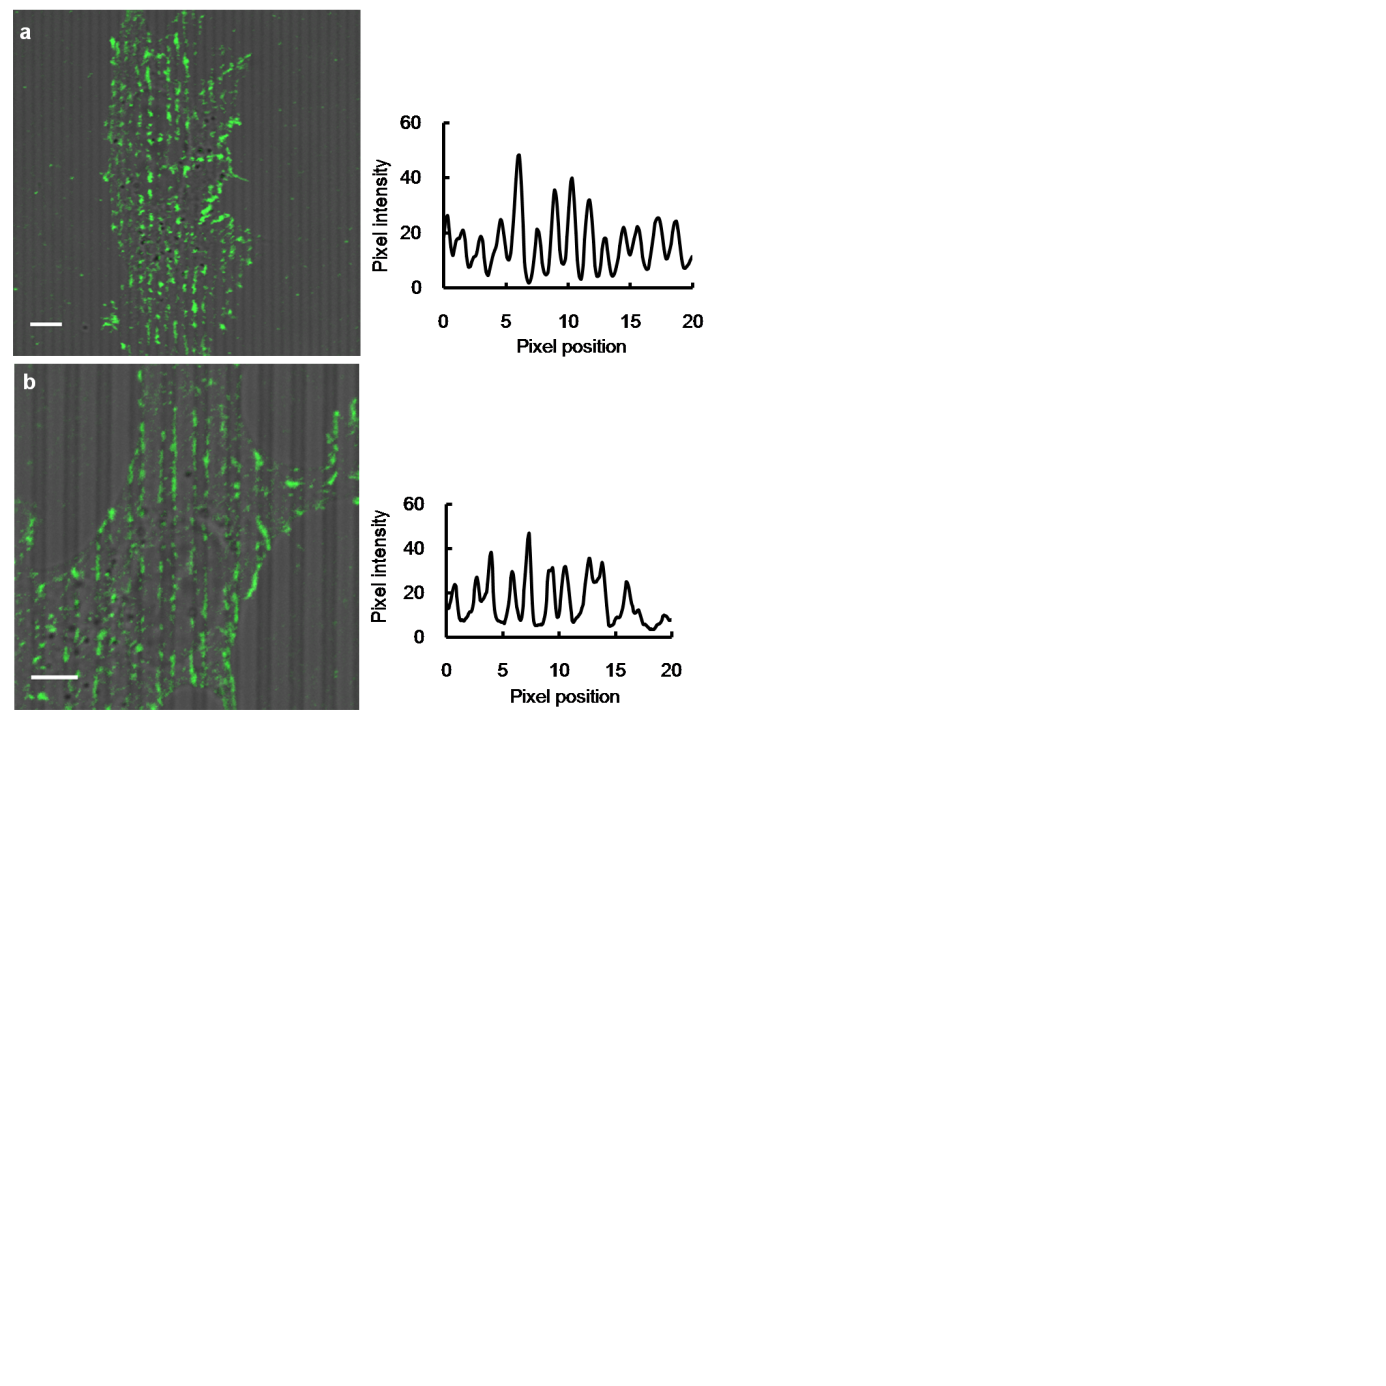


Figure S3: Z-stack projection confocal image and corresponding fluorescence intensity distribution profile of a BAEC cultured for 24 hrs on µG-0.7µm (a) and µG-2µm (b) substrates. FAs (green) were visualized with anti-vinculin antibody and superimposed onto the transmission image (grayscale). The zero position corresponds to the beginning of a ridge. Scale bar is 4 µm.


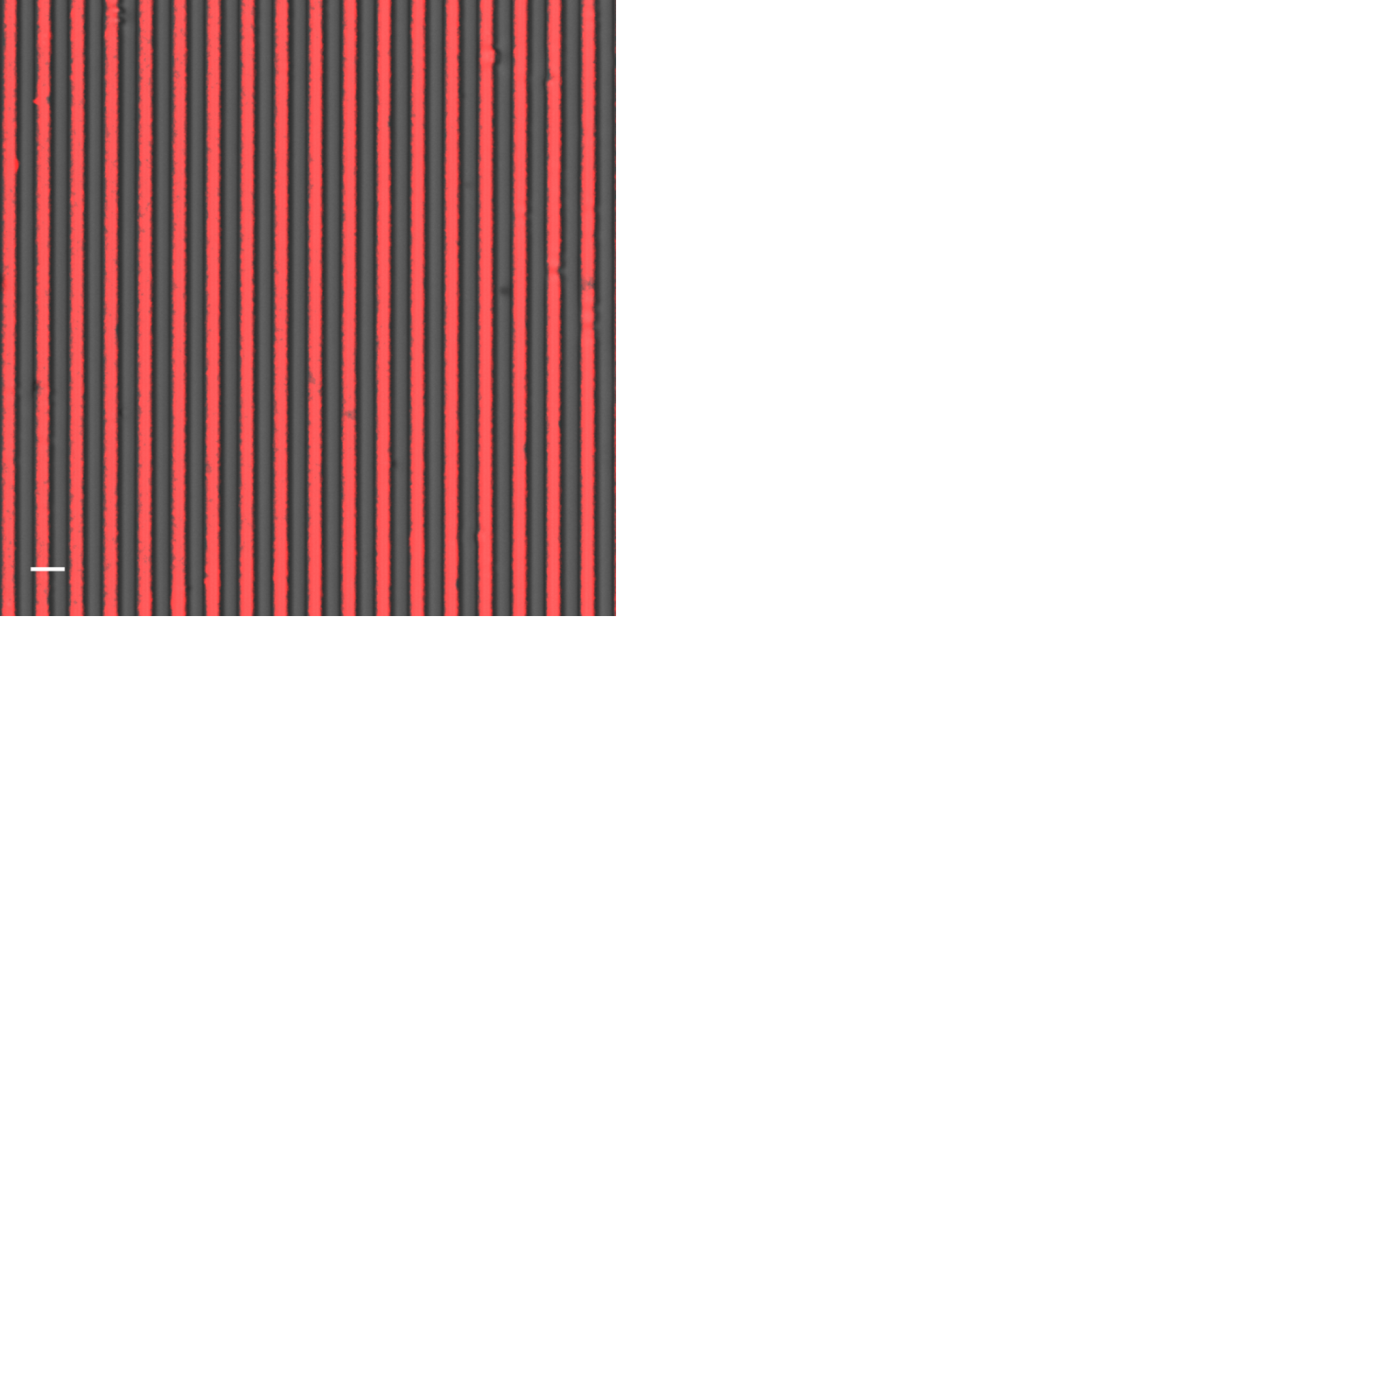


Figure S4: Z-stack projection confocal image of fibronectin distribution (red) superimposed on the transmission image (grayscale) of a µG-FnR substrate. Scale bar is 10 µm.


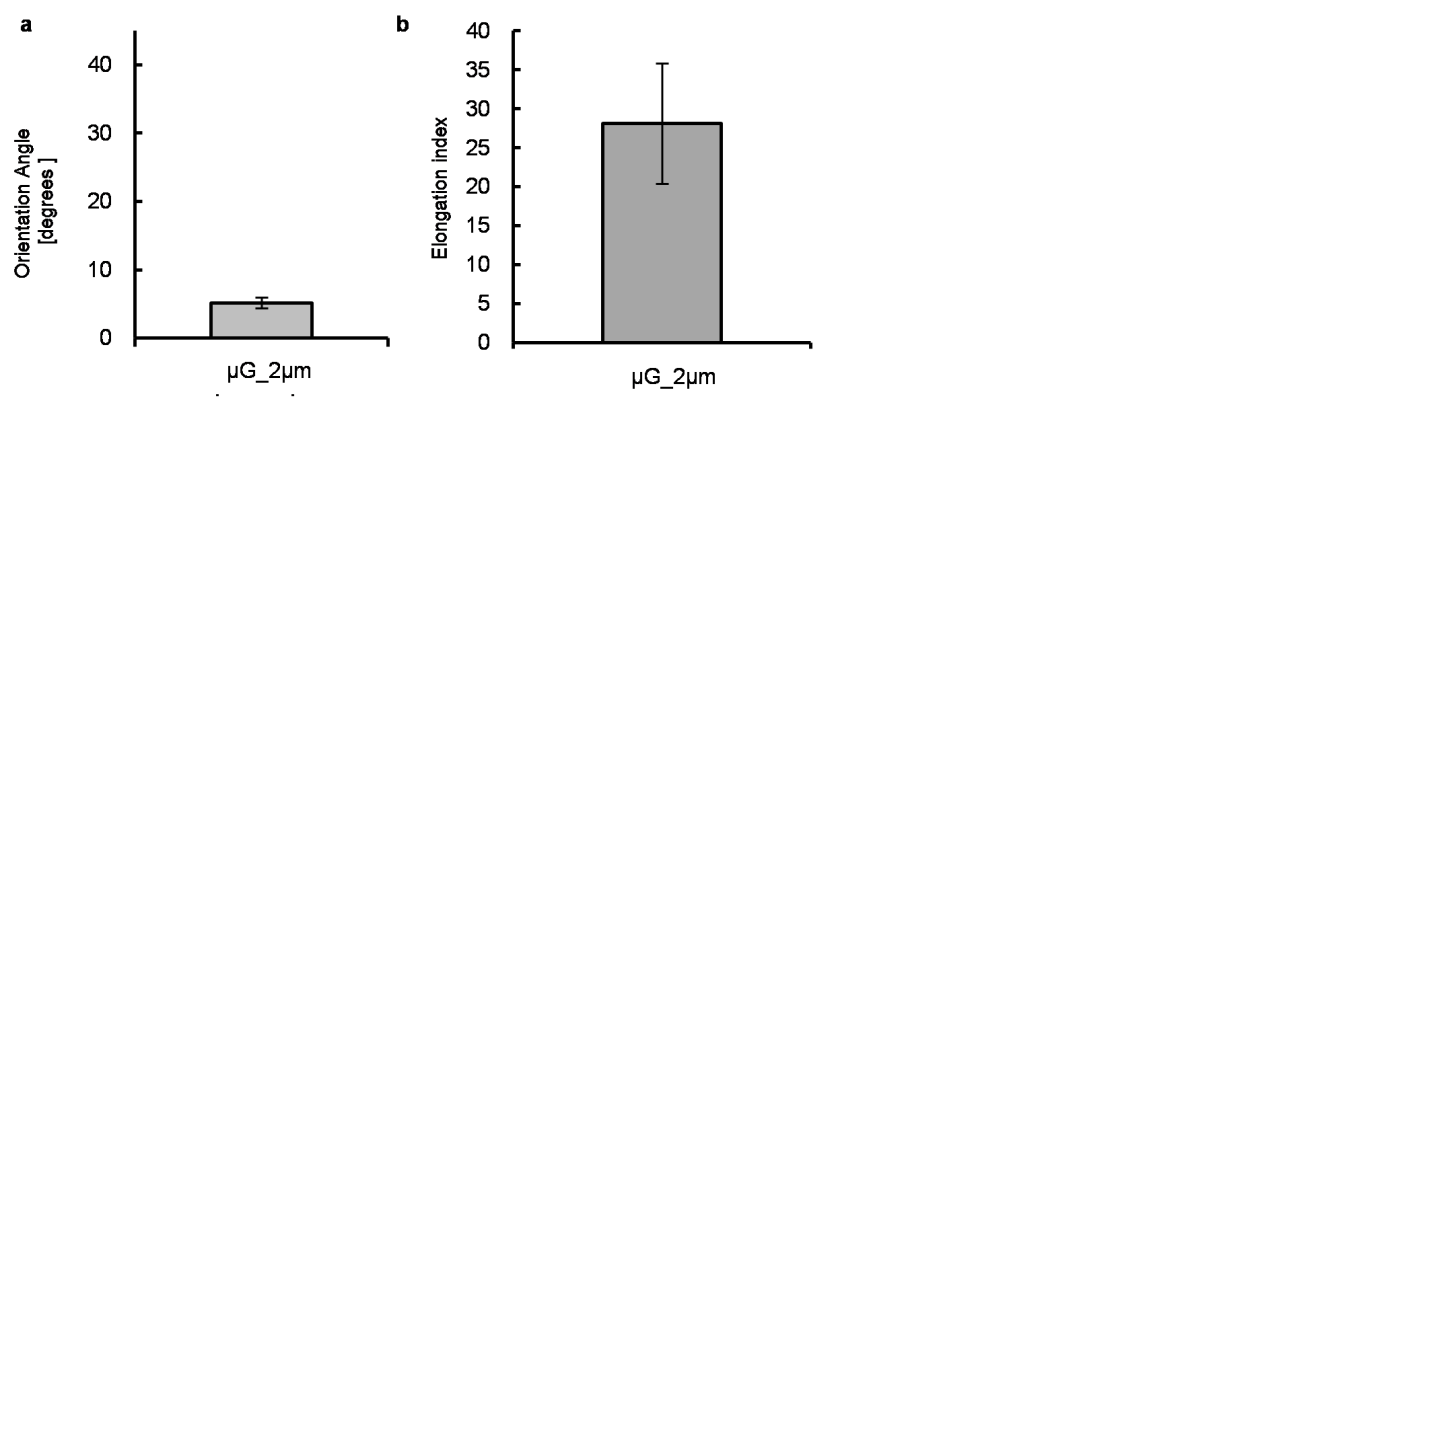


Figure S5: Cell orientation (a) and elongation index (b) for BAECs (n=23 cells) cultured on a µG_2 µm surface. Data are mean±SEM.


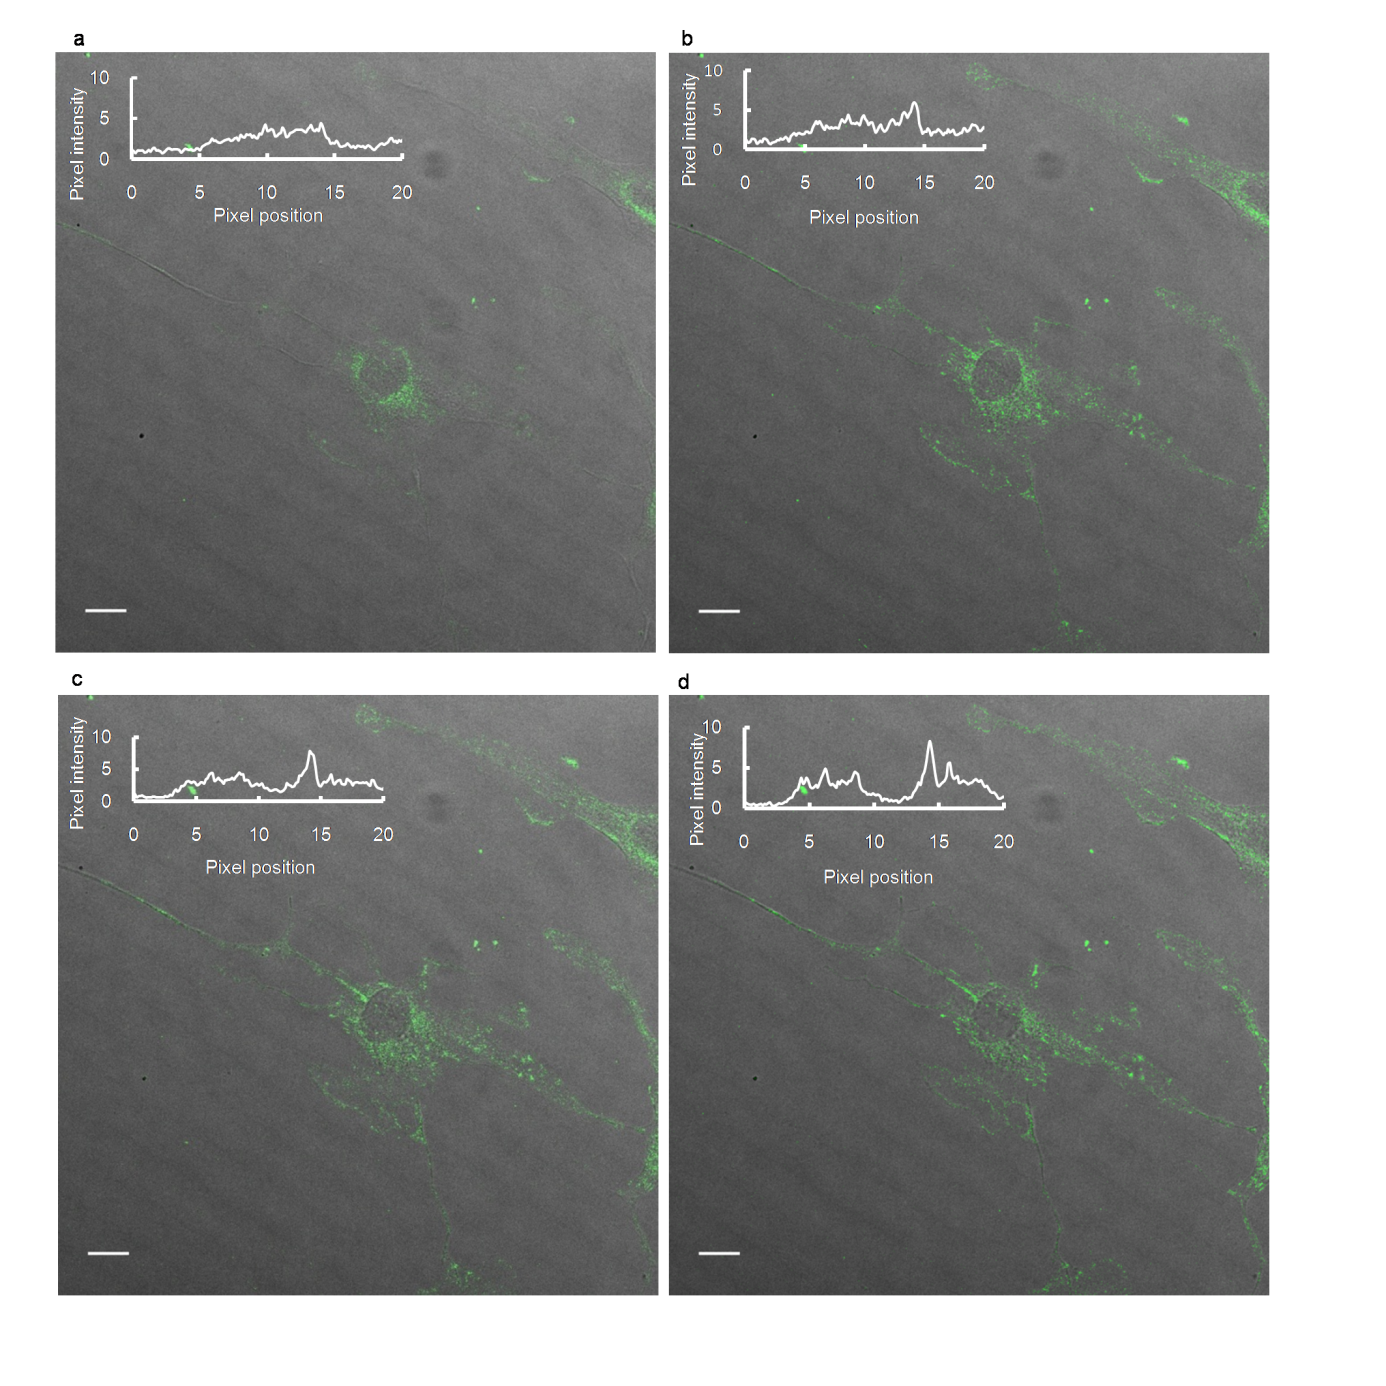


Figure S6: Confocal z-scan imaging and corresponding fluorescence intensity distribution profiles of BAECs cultured for 24 hrs on a µG substrate in the presence of blebbistatin (a=apical plane, d=basal plane). FAs (green) were visualized with an anti-vinculin antibody and were superimposed on the transmission image (grayscale). The zero position corresponds to the beginning of a ridge. Scale bar is 5 µm.
